# Supplementary material
Source: PubMed Central journal article supplement (PMC58756)
Supplement: pnas_98_20_11485__1.pdf [file pnas_98_20_11485__1.pdf]

**Table 2. Family haplotype data**

| <b>Marker Name</b> | <b>Primer sequences</b>                                             | <b>Polymorphism</b>  |
|--------------------|---------------------------------------------------------------------|----------------------|
| <b>ph33</b>        | F: GAGAACCGCTTTATTCCCAGG<br>R: CTTTTCTCTAACCTCCTAGCAG               | SNP                  |
| <b>centB</b>       | F: TGGACGGAAGTGGGACCATC<br>R: AGCTCGTTGGCCACACGCTT                  | SNP                  |
| <b>ph49</b>        | F: TCTCGGTTATATTTGAGTCTGTATC<br>R: CCTCATATTAAGGCCTGTTTAC           | SNP                  |
| <b>ph105</b>       | F: TTGCTCTCAGATCTCAGAAGAG<br>R: GTTCAAGATGGCAACAATAGATC             | SNP                  |
| <b>ph108</b>       | F: GTACTTGATATTTATATACATCCTAATC<br>R: TGAGATCGCAGCAGTGCCT           | SNP                  |
| <b>mpht2</b>       | F: TGTTTATTGTGTGTCTGCTGTG<br>R: GGACAACCAACATGCAAACAG               | SNP                  |
| <b>1140</b>        | F: GGGCAGGGATCATATCTAATTTG<br>R: CATACATGGGTAGGGCAAAGG              | (CA) <sub>n</sub>    |
| <b>ph77</b>        | F: GGTTCTATTTTCAAGTCCAGTG<br>R: CACTTAATACCACCCAGCCTG               | SNP                  |
| <b>ph78</b>        | F: CGCTCTACAGCACTTGAATGTG<br>R: AGGTTCTGGGATTAGGGTG                 | SNP                  |
| <b>ca234</b>       | F: CCTAAATCTTTGACCCCTG<br>R: CTTAAAGTGGGTGATAGGTGG                  | (CA) <sub>n</sub>    |
| <b>ph81</b>        | F: AAATGTCAGGCTCACCTATCTG<br>R: CTGTCCAGAATACTAAAGAAACC             | short tandem repeats |
| <b>ph84</b>        | F: GGGACCATATGTACATGTATGC<br>R: CTGCAATGCATTAATTTGCACAATG           | SNP                  |
| <b>ph89</b>        | F: CCTTAATCTACAAATGCGCCAG<br>R: GCACCAACATAACCTAACATACTAC           | SNP                  |
| <b>ph205</b>       | F: AGATTGCCCTTGGAGCACTTAG<br>R: GCTCTCAGGTGCAACTTTTAAG              | SNP                  |
| <b>ph92</b>        | F: TTGGTGCAATGCAATAAAGTTTGTG<br>R: CACTGTCTCAATCTACAAAGAACC         | SNP                  |
| <b>ph211</b>       | F: CATACTCTTAATGTGTAATAAACAAGAG<br>R: CTGAAAAATCATGATAATACTATTACCTC | SNP                  |
| <b>ph202</b>       | F: AGAAACGGGTCAGGTCTAGAG<br>R: TCTAGAGGTAGACACACATGTC               | SNP                  |
| <b>ph208</b>       | F: GTTACTGAGTCATCAACAGATCT<br>R: TGAACGTTCATAAAGAGTCACATG           | SNP                  |
| <b>ph201</b>       | F: CCTGGCATTTCATCACGTAAAC<br>R: ATCAGGAACGTCCAGGCACTTA              | SNP                  |
| <b>TS16</b>        | F: TCACAGTGTCTTTTGTGACTG<br>R: GTGTTTTCCATAAAATACGTATGTC            | SNP                  |
| <b>TS30</b>        | F: GCACCTACTGGTATAAATGCAC<br>R: TTCTTCATAGAACTGATATTCTGG            | SNP                  |
| <b>MR16</b>        | F: GCTACTCAACAGAAATGAAGGAG<br>R: TTAAGCCCTTTCACCTCAGAAAG            | SNP                  |

| <b>Marker Name</b> | <b>Primer sequences</b>                                       | <b>Polymorphism</b> |
|--------------------|---------------------------------------------------------------|---------------------|
| <b>rts6</b>        | F: ACCCACCTTATAATTGATTCAGGC<br>R: TATCCAGAAAGCTTCCAAACTCA     | SNP                 |
| <b>rts2</b>        | F: TTCTTTTCGGGTTTCTCACACTG<br>R: TCACCAACTTCAGTGCCTTTTTC      | SNP                 |
| <b>EXON8</b>       | F: GATAAACTTGTTCCACTATATGCTG<br>R: AAACAAAGTGTCAGGTTTCTTCTATC | SNP                 |
| <b>EXON7a</b>      | F: CTTAAAACATTGATACACTATATGCC<br>R: ATTTCCCAAGCATCTTTTGCTAGAC | SNP                 |
| <b>EXON7b</b>      | F: GCAAAAGATGCTTGGGAAATCC<br>R: CATAAATTGTTGCACTTTAATCCAC     | SNP                 |
| <b>ys19</b>        | F: TTGGTACCATTACCGACCC<br>R: ACAAAGGATAGGCAGGACC              | SNP                 |
| <b>ys12</b>        | F: ATCCTTTTGGGAGGTTACCC<br>R: CTGTA ACTCCAGCTACTTGG           | SNP                 |
| <b>ca231</b>       | F: CACATGTGTACCCATGTAACAAAC<br>R: TTCAGCACATGTATCCCAGAAC      |                     |
| <b>YUM1</b>        | F: GCTTTGCTGTGGTCAGGATAG<br>R: TCCATTCAATCTCCGCGGCAG          | SNP                 |
| <b>at201</b>       | F: CATAACAGCGCTTTCTCATAACAG<br>R: GATAAATAGCTAGACGACCTTG      |                     |
| <b>ca225</b>       | F: GATTATAGGTGTGAGCCACCAC<br>R: GACAGACATTACAAGCAATTTTCG      | (ATA) <sub>n</sub>  |

F, forward; R, reverse.
